# Supplementary material
Source: publisher site journal article supplement (https://www.dovepress.com/article/603790)
Supplement: Supplementary file 2 [file 603790 Figure S2.pdf › 603790 Figure S2.pdf]

**Figure S2. Postevent Anonymous Survey**  
Peer and Flipped Education Survey Questionnaire

Name (optional): \_\_\_\_\_

Grade: \_\_\_\_\_

Major: \_\_\_\_\_

**Section I: Participation in Peer Education**

What form does peer education take? (Select all that apply)

- ☐ Group discussions
- ☐ Peer tutoring
- ☐ Academic lectures
- ☐ Practical activities
- ☐ Other, please specify: \_\_\_\_\_

Why you choose this topic for peer teaching?

- ☐ Inspired by patient case
- ☐ Instructor's suggestion
- ☐ Recommended by others
- ☐ Low difficulty
- ☐ Interest
- ☐ Familiarity with the topic
- ☐ Coincidence
- ☐ Current hot topic

For those of you who attend the peer education: how long should be used to prepare the lecture?

- ☐ One month
- ☐ Two weeks
- ☐ One week
- ☐ Three days
- ☐ One day
- ☐ A few hours
- ☐ A few minutes

For those of you who attend the peer education: which source of topic originated from?

- ☐ Resource library
- ☐ Books
- ☐ Guidelines
- ☐ Other

For those of you who attend the peer education: Self-Evaluation

dissatisfied 

|                                  |                                  |                                  |                                  |                                  |                                  |                                  |                                  |                                  |                                  |
|----------------------------------|----------------------------------|----------------------------------|----------------------------------|----------------------------------|----------------------------------|----------------------------------|----------------------------------|----------------------------------|----------------------------------|
| 1                                | 2                                | 3                                | 4                                | 5                                | 6                                | 7                                | 8                                | 9                                | 10                               |
| <input checked="" type="radio"/> |

 very satisfied

For those of you who attend the peer education: Self-Rating of Nervousness

Calm 

|                                  |                                  |                                  |                                  |                                  |                                  |                                  |                                  |                                  |                                  |
|----------------------------------|----------------------------------|----------------------------------|----------------------------------|----------------------------------|----------------------------------|----------------------------------|----------------------------------|----------------------------------|----------------------------------|
| 1                                | 2                                | 3                                | 4                                | 5                                | 6                                | 7                                | 8                                | 9                                | 10                               |
| <input checked="" type="radio"/> |

 Extremely nervous

Feedback on Ability Enhancement:

- ☐ Communication Skills
- ☐ Confidence
- ☐ Problem Solving
- ☐ Deep Understanding of Concepts
- ☐ Critical Thinking
- ☐ Behavioral and Attitudinal Change
- ☐ Teamwork and Collaboration
- ☐ Other, please specify: \_\_\_\_\_

- ☐ Very positive
- ☐ Somewhat positive
- ☐ No impact
- ☐ Somewhat negative
- ☐ Very negative

- ☐ Yes, very effective
- ☐ Yes, effective
- ☐ Neutral
- ☐ No, not effective

- ☐ Yes, highly recommend
- ☐ Yes, recommend
- ☐ Not sure
- ☐ No, wouldn't recommend

What form does peer education take? (Select all that apply)

- ☐ Group discussions
- ☐ Peer tutoring
- ☐ Academic lectures
- ☐ Practical activities
- ☐ Other, please specify: \_\_\_\_\_

1 2 3 4 5 6 7 8 9 10

unfamiliar  very familiar

For those of you who attend the flipped education: How difficult and understandable the content is?

|                          | 1                                | 2                                | 3                                | 4                                | 5                                | 6                                | 7                                | 8                                | 9                                | 10                               |                    |
|--------------------------|----------------------------------|----------------------------------|----------------------------------|----------------------------------|----------------------------------|----------------------------------|----------------------------------|----------------------------------|----------------------------------|----------------------------------|--------------------|
| being hard to understand | <input checked="" type="radio"/> | easy to understand |

For those of you who attend the flipped education: How helpful the content is for the work?

|            | 1                                | 2                                | 3                                | 4                                | 5                                | 6                                | 7                                | 8                                | 9                                | 10                               |             |
|------------|----------------------------------|----------------------------------|----------------------------------|----------------------------------|----------------------------------|----------------------------------|----------------------------------|----------------------------------|----------------------------------|----------------------------------|-------------|
| Not useful | <input checked="" type="radio"/> | Very useful |

Feedback on Ability Enhancement:

After participating in peer education, which of the following abilities have you significantly improved? (Select all that apply)

- ☐ Communication Skills
- ☐ Confidence
- ☐ Problem Solving
- ☐ Deep Understanding of Concepts
- ☐ Critical Thinking
- ☐ Behavioral and Attitudinal Change
- ☐ Teamwork and Collaboration
- ☐ Other, please specify: \_\_\_\_\_

How do you perceive the impact of flipped education on your academic performance?

- ☐ Very positive
- ☐ Somewhat positive
- ☐ No impact
- ☐ Somewhat negative
- ☐ Very negative

Do you think flipped education enhances your understanding of the study material?

- ☐ Yes, very effective
- ☐ Yes, effective
- ☐ Neutral
- ☐ No, not effective
